# Supplementary material for: Fluoride substitution in sodium hydride for thermal energy storage applications
Source: Royal Society of Chemistry journal article supplement (doi:10.1039/c6ta03623f), 2016-01-01
Supplement: c6ta03623f1.pdf [file c6ta03623f1.pdf]

## Supporting information

Belonging to the manuscript

### Fluoride substitution in sodium hydride for thermal energy storage applications

Terry D. Humphries,\* Drew A. Sheppard, Matthew R. Rowles, M. Veronica Sofianos, Craig. E. Buckley

Hydrogen Storage Research Group, Fuels and Energy Technology Institute, Curtin University,  
GPO Box U1987, Perth, WA 6845, Australia

E-mail: [terry\\_humphries81@hotmail.com](mailto:terry_humphries81@hotmail.com)

**Table S1.** Peak positions and corresponding Miller indices of the  $\text{NaH}_x\text{F}_{1-x}$  mixtures after Ball milling and annealing determined by Rietveld refinement of the SR-XRD data. Relative peak intensities in parentheses.  $\lambda = 0.824890 \text{ \AA}$ ,  $27 \text{ }^\circ\text{C}$ .

| hkl | Peak position ( $2\theta$ ) |                                    |                                    |                                  |                                  |              |
|-----|-----------------------------|------------------------------------|------------------------------------|----------------------------------|----------------------------------|--------------|
|     | NaH                         | $\text{NaH}_{0.95}\text{F}_{0.05}$ | $\text{NaH}_{0.85}\text{F}_{0.15}$ | $\text{NaH}_{0.7}\text{F}_{0.3}$ | $\text{NaH}_{0.5}\text{F}_{0.5}$ | NaF          |
| 111 | 16.83 (1)                   | 16.89 (1)                          | 17.01 (0.81)                       | 17.24 (0.45)                     | 17.31 (0.23)                     | 17.74 (0.02) |
| 002 | 19.46 (0.64)                | 19.53 (0.85)                       | 19.66 (1)                          | 19.94 (1)                        | 20.01 (1)                        | 20.51 (1)    |
| 022 | 27.65 (0.39)                | 27.75 (0.50)                       | 27.95 (0.59)                       | 28.34 (0.59)                     | 28.45 (0.56)                     | 29.16 (0.59) |
| 311 | 32.55 (0.37)                | 32.67 (0.37)                       | 32.90 (0.32)                       | 33.37 (0.20)                     | 33.49 (0.10)                     | 34.34 (0.02) |
| 222 | 34.04 (0.11)                | 34.16 (0.14)                       | 34.41 (0.17)                       | 34.90 (0.17)                     | 35.03 (0.15)                     | 35.91 (0.17) |

**Table S2.** Compositions of  $\text{NaH}_x\text{F}_{1-x}$  mixtures after Ball milling and annealing determined by Rietveld refinement of the SR-XRD data.  $\lambda = 0.824890 \text{ \AA}$ ,  $27 \text{ }^\circ\text{C}$ .

| Sample                             | Composition (wt.%)           |      |
|------------------------------------|------------------------------|------|
|                                    | $\text{NaH}_x\text{F}_{1-x}$ | NaOH |
| NaH                                | 88                           | 12   |
| $\text{NaH}_{0.95}\text{F}_{0.05}$ | 91.0                         | 9.0  |
| $\text{NaH}_{0.85}\text{F}_{0.15}$ | 90.5                         | 9.5  |
| $\text{NaH}_{0.7}\text{F}_{0.3}$   | 88.6                         | 11.4 |
| $\text{NaH}_{0.5}\text{F}_{0.5}$   | 96.3                         | 3.7  |
| NaF                                | 100                          | 0    |

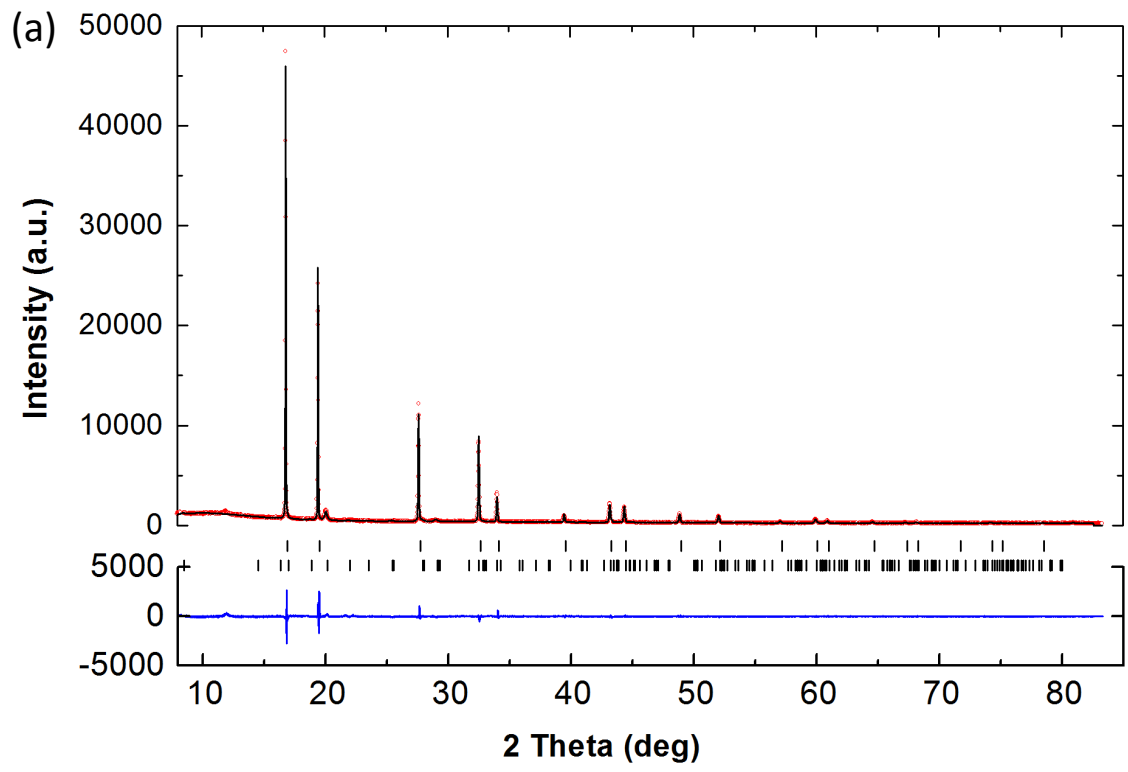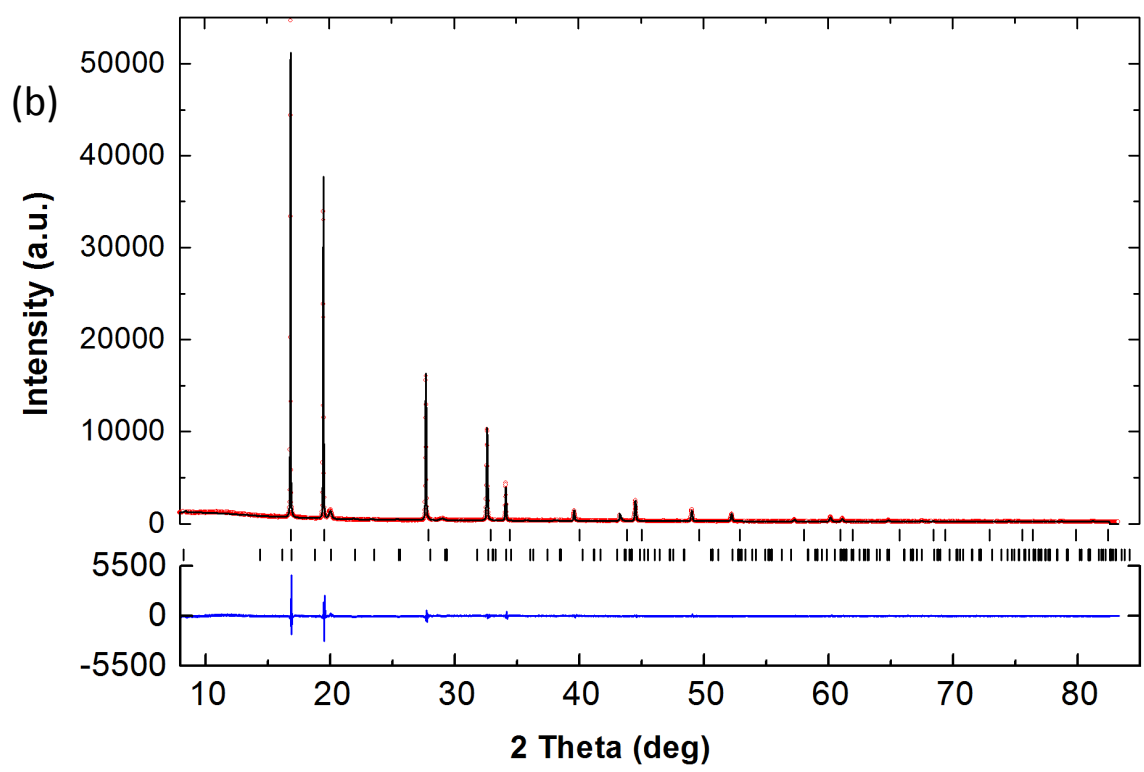

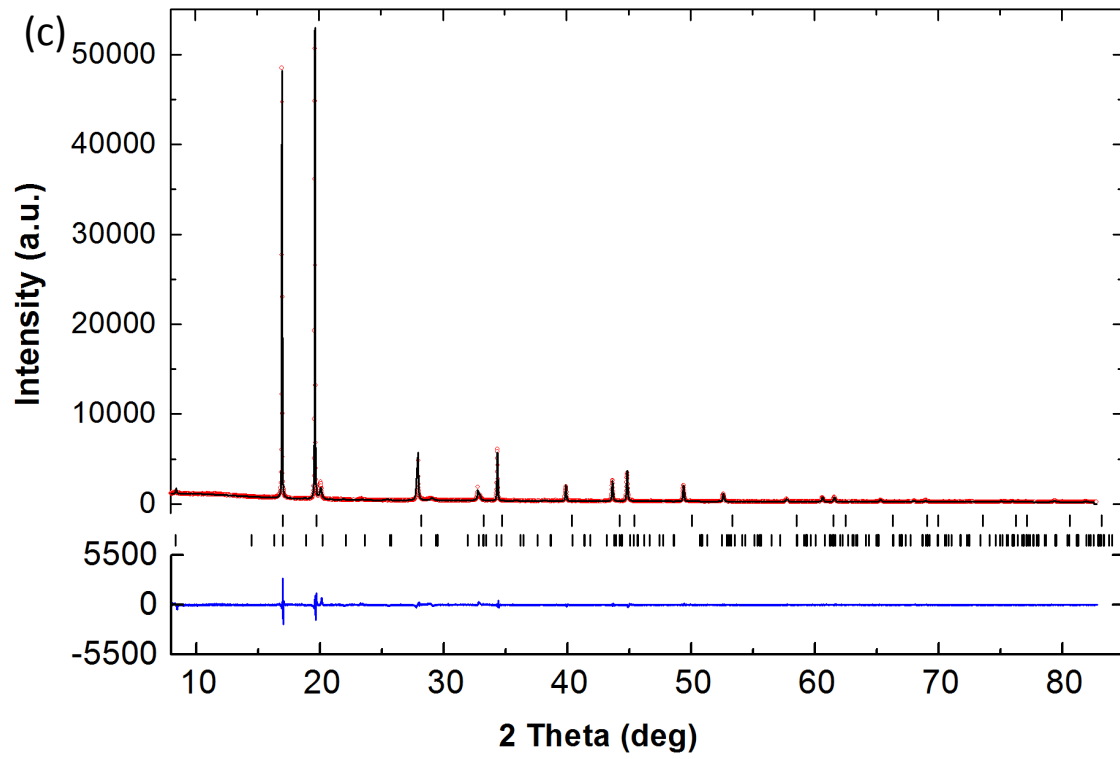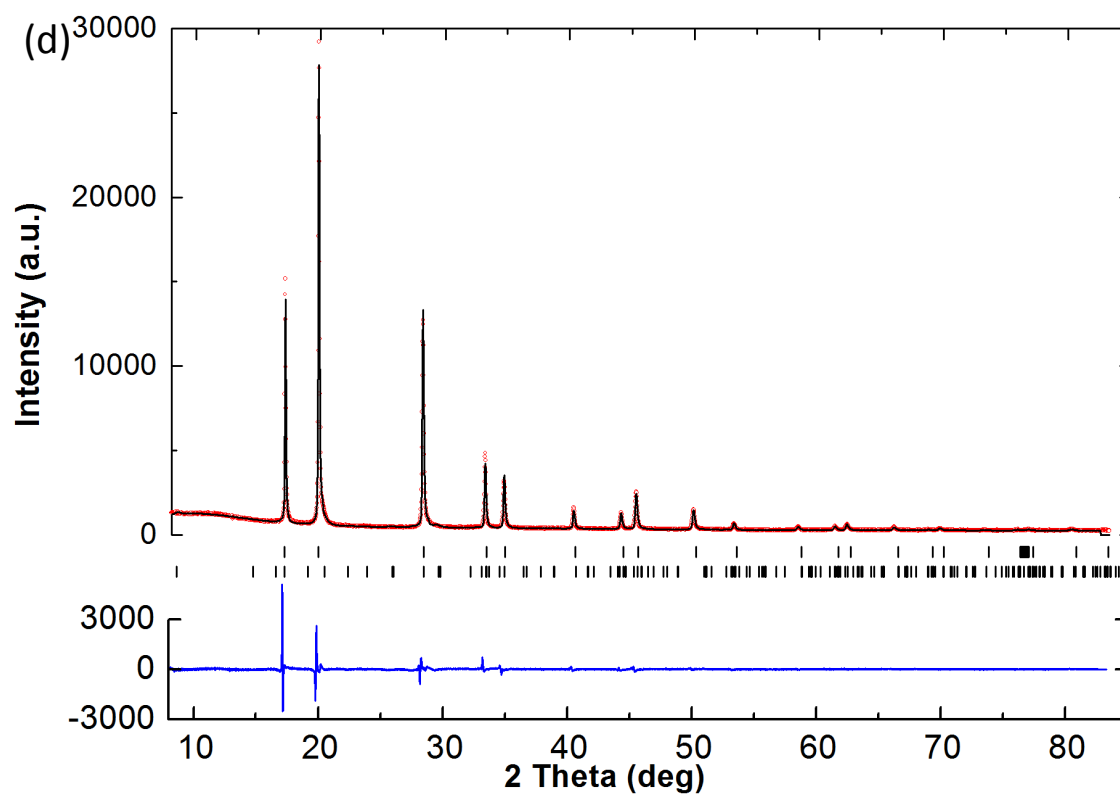

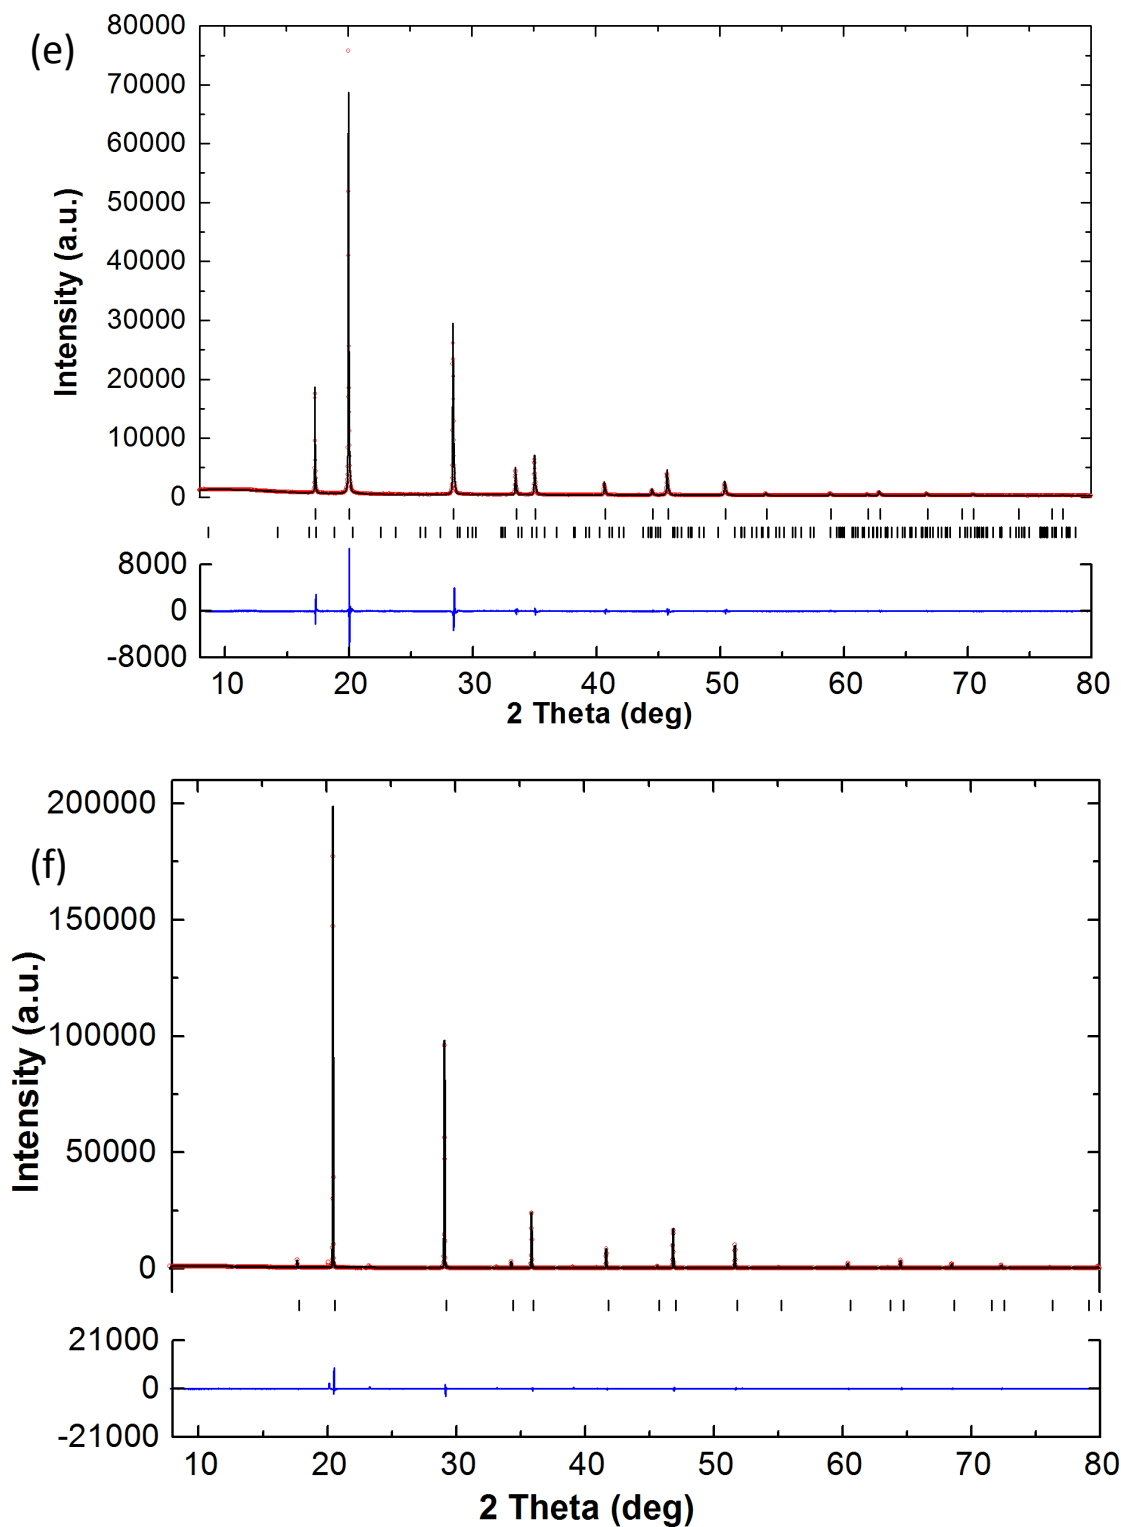

**Fig. S1.** Rietveld refinement plot of (a) NaH, (b) NaH<sub>0.95</sub>F<sub>0.05</sub>, (c) NaH<sub>0.85</sub>F<sub>0.15</sub>, (d) NaH<sub>0.7</sub>F<sub>0.3</sub>, (e) NaH<sub>0.5</sub>F<sub>0.5</sub> and (f) NaF. Experimental data as red circles, calculated diffraction pattern as black line and the difference plot in blue. Tick marks show positions for: (a - e) NaH<sub>x</sub>F<sub>1-x</sub> (top) and NaOH (bottom), respectively; (f) NaF.  $\lambda = 0.824890 \text{ \AA}$ ,  $T = 27 \text{ }^\circ\text{C}$ .

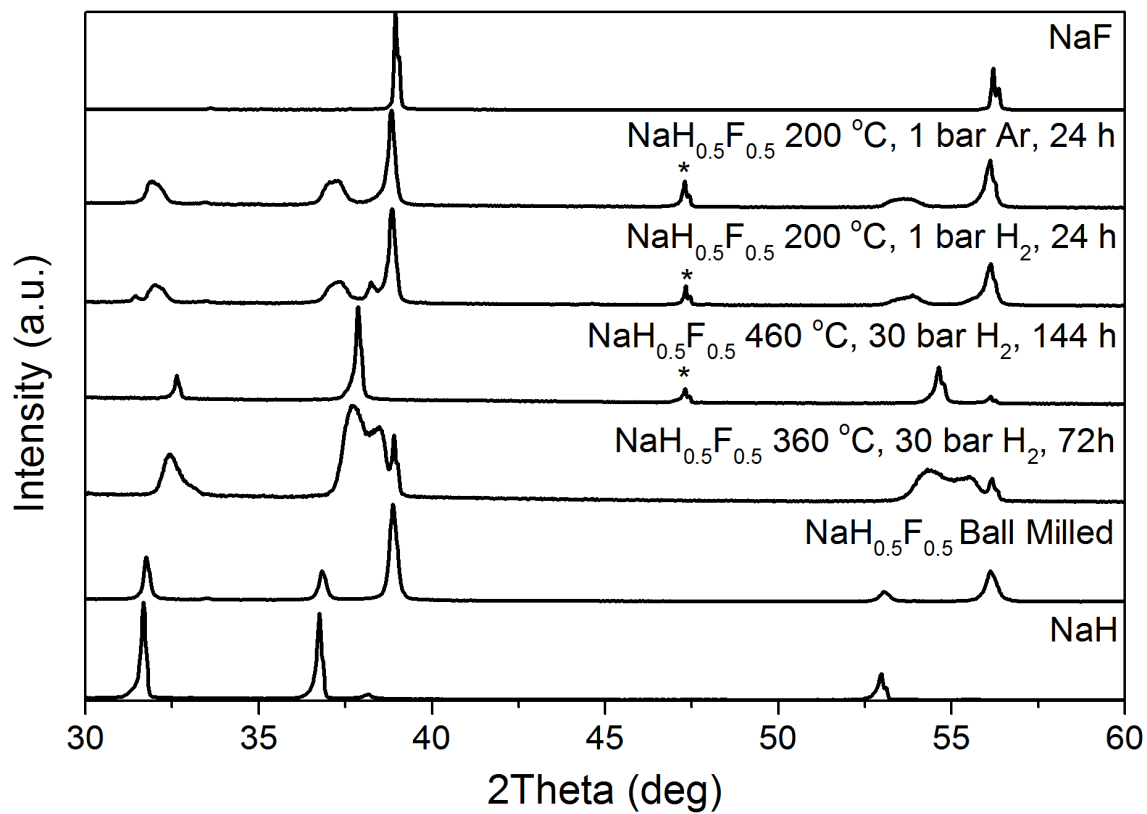

**Fig. S2.** XRD patterns of NaH<sub>0.5</sub>F<sub>0.5</sub> mixtures annealed at various temperatures and atmospheres. \* = Si internal standard.  $\lambda = \text{CuK}\alpha$ .

**Table S3.** Lattice Parameters of NaH<sub>0.5</sub>F<sub>0.5</sub> mixtures annealed at various temperatures and atmospheres. ESD's derived by Rietveld refinement are in parentheses.

| Sample                                | Lattice Parameter (Å) | Wt.% (%) | Composition <sup>†</sup>              |
|---------------------------------------|-----------------------|----------|---------------------------------------|
| NaH (as supplied)*                    | 4.88166(5)            | 95.44(1) | NaH                                   |
|                                       | NA                    | 3.221(8) | NaOH <sup>†</sup>                     |
|                                       | NA                    | 1.381(2) | Na                                    |
| NaF (as supplied)*                    | 4.633222(4)           | 100      | NaF                                   |
| NaH + NaF (50:50 mol.%) Ball milled*  | 4.8805(2)             | 27.5(2)  | NaH                                   |
|                                       | NA                    | 5.1(3)   | NaOH <sup>†</sup>                     |
|                                       | 4.6326(1)             | 67.3(3)  | NaF                                   |
| 30 bar H <sub>2</sub> , 300 °C, 72 h* | 4.7647(4)             | 53.6(6)  | NaH <sub>0.57</sub> F <sub>0.43</sub> |
|                                       | 4.6865(4)             | 39.7(6)  | NaH <sub>0.25</sub> F <sub>0.75</sub> |
|                                       | 4.6266(2)             | 6.7(4)   | NaF                                   |
| 30 bar H <sub>2</sub> , 460 °C, 114 h | 4.74362(8)            | 100      | NaH <sub>0.5</sub> F <sub>0.5</sub>   |
| 1 bar H <sub>2</sub> , 200 °C, 24 h   | 4.810(1)              | 29(1)    | NaH <sub>0.76</sub> F <sub>0.24</sub> |
|                                       | 4.856(1)              | 4.2(9)   | NaH <sub>0.95</sub> F <sub>0.05</sub> |
|                                       | 4.6317(1)             | 44(1)    | NaF                                   |
|                                       | NA                    | 14.4(5)  | NaOH <sup>†</sup>                     |
|                                       | NA                    | 5.2(1)   | Si                                    |
| 1 bar H <sub>2</sub> , 200 °C, 24 h   | 4.8552(4)             | 13.2(6)  | NaH <sub>0.95</sub> F <sub>0.05</sub> |
|                                       | 4.6334(1)             | 43.7(6)  | NaF                                   |
|                                       | 4.8171(5)             | 28.2(7)  | NaH <sub>0.79</sub> F <sub>0.21</sub> |
|                                       | NA                    | 6.0(5)   | NaOH <sup>†</sup>                     |
|                                       | NA                    | 8.8(1)   | Si                                    |

<sup>†</sup>Composition determined by Eq 1 in main text. \* No internal Si standard used for determination of lattice parameters so compositions may not be entirely accurate. <sup>†</sup> Presence of NaOH is most likely due to air exposure through PMMA XRD sample holder.

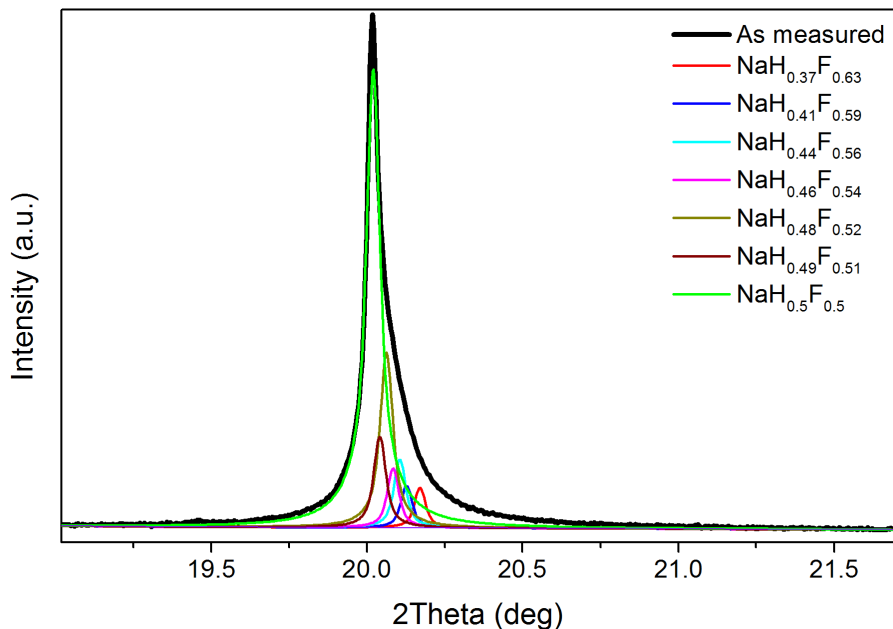

**Fig. S3.** SR-XRD patterns of  $\text{NaH}_{0.5}\text{F}_{0.5}$  between 18 and  $22^\circ$   $2\theta$  along with profiles fitted during Reitveld refinement showing composition.  $\lambda = 0.824890 \text{ \AA}$ ,  $T = 27^\circ \text{C}$ .

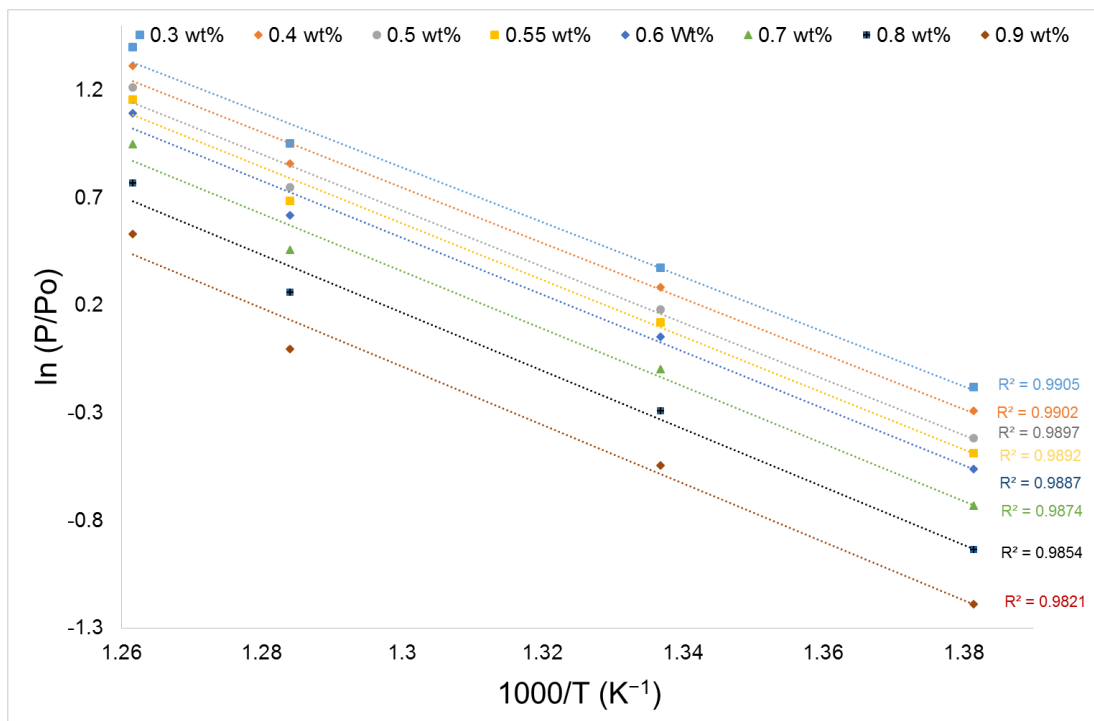

**Fig. S4.** Van't Hoff plots of  $\text{NaH}_{0.5}\text{F}_{0.5}$  determined over the entire decomposition process by numerical fitting of the PCI data (method 2).

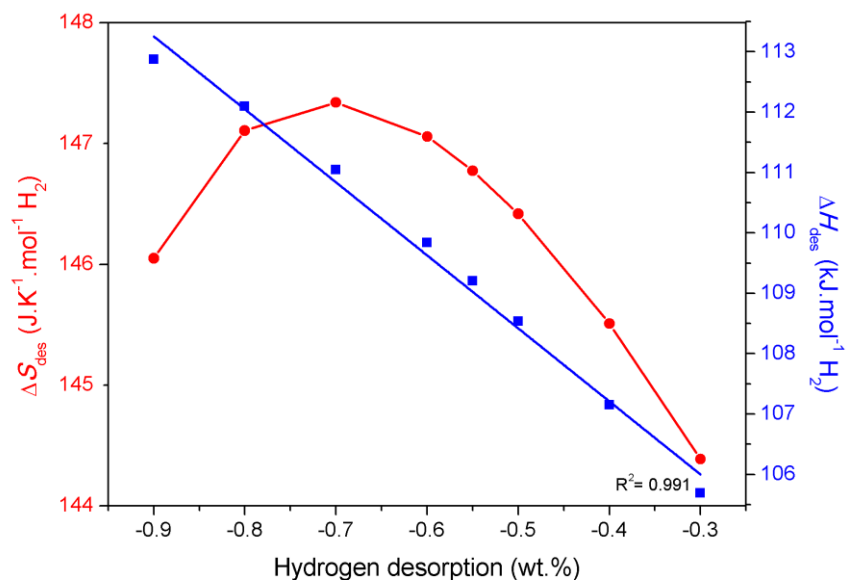

**Fig. S5.** Variation of  $\Delta H$  and  $\Delta S$  over the duration of Hydrogen desorption determined by numerical fitting of the PCI data (method 2).

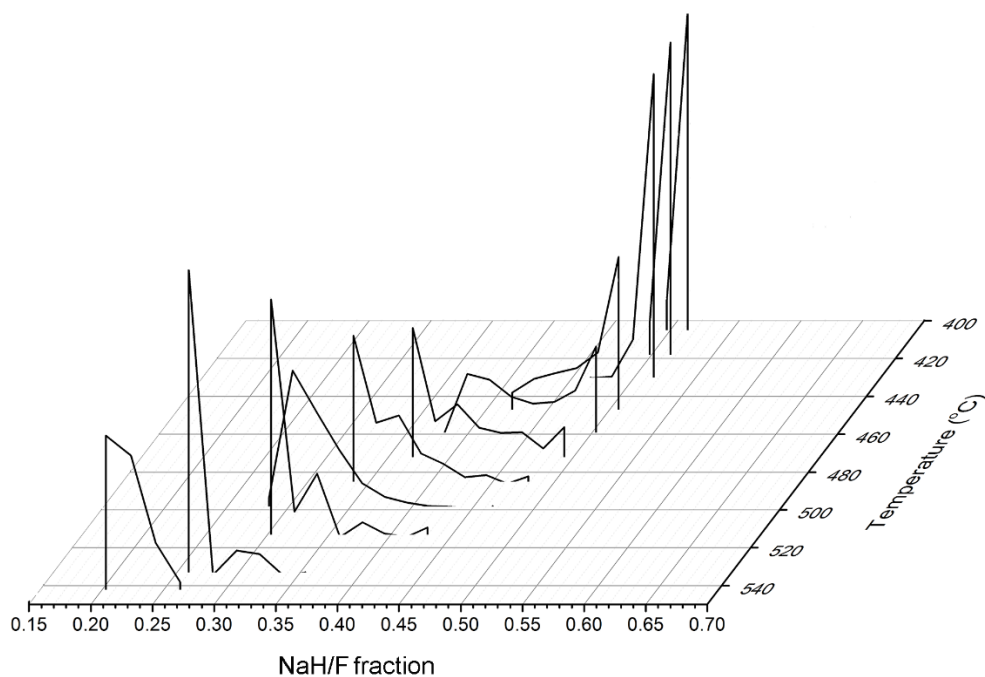

**Fig. S6.** Composition of  $\text{NaH}_{0.5}\text{F}_{0.5}$  as a function of temperature measured by *in situ* XRD during heating. †

† $\text{NaH}_{1-x}\text{F}_x$  compositions were determined by correlation of the refined lattice parameters of data at specific temperatures. The thermal expansion of  $\text{NaH}$ ,  $\text{NaH}_{0.95}\text{F}_{0.05}$ ,  $\text{NaH}_{0.85}\text{F}_{0.15}$ ,  $\text{NaH}_{0.7}\text{F}_{0.3}$ ,  $\text{NaH}_{0.5}\text{F}_{0.5}$  and  $\text{NaF}$  were measured by *in situ* XRD. The lattice parameters of each composite at a specific temperature were then treated by a quadratic expression to allow determination of any  $\text{NaH}_{1-x}\text{F}_x$  composition at any temperature.



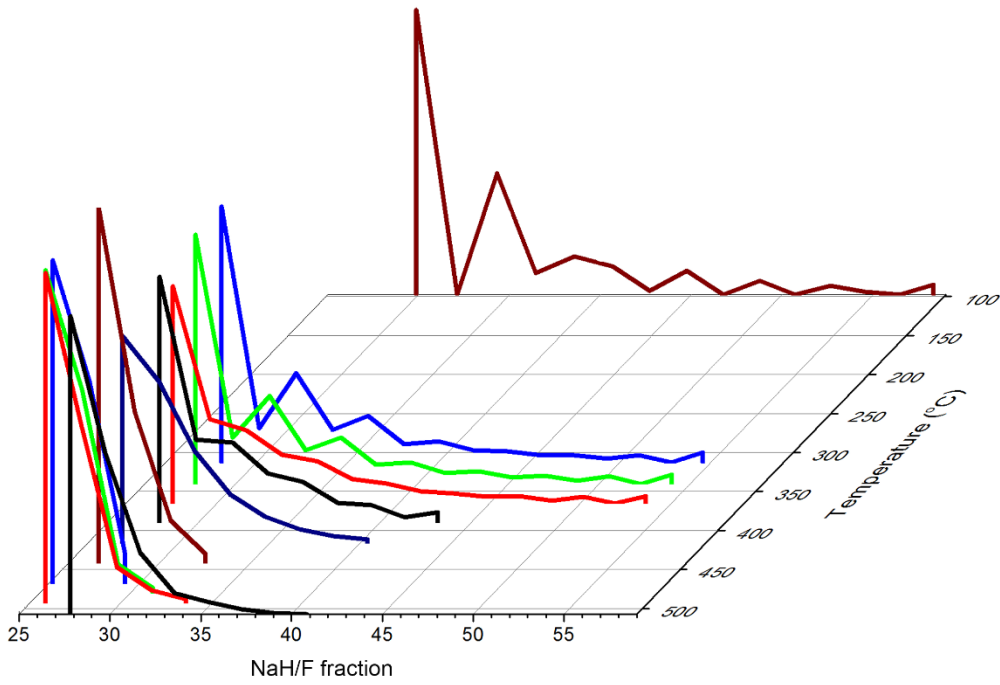

**Fig. S7.** Composition of  $\text{NaH}_{0.5}\text{F}_{0.5}$  as a function of temperature measured by *in situ* XRD during cooling.]
